# Supplementary material
Source: MDPI journal article supplement (https://www.mdpi.com/2304-6740/11/6/248)
Supplement: s1 [file s1]

## *SUPPORTING INFORMATION*

# **Synthesis, Structure and Bonding of the Tungstaboranes [Cp\*W(CO)<sub>2</sub>B<sub>3</sub>H<sub>8</sub>] and [(Cp\*W)<sub>3</sub>(CO)<sub>2</sub>B<sub>4</sub>H<sub>7</sub>]**

*Stutee Mohapatra<sup>1</sup>, Sourav Gayen<sup>1</sup>, Sampad Shyamal<sup>1</sup>, Jean-François Halet<sup>\*,2</sup> and Sundargopal Ghosh<sup>\*,1</sup>*

<sup>1</sup>Department of Chemistry, Indian Institute of Technology Madras, Chennai-600036, TN, India

<sup>2</sup>CNRS–Saint-Gobain–NIMS, IRL 3629, Laboratory for Innovative Key Materials and Structures (LINK), National Institute for Materials Science (NIMS), Tsukuba, 305-0044, Japan

\* Correspondence: [Jean-Francois.Halet@univ-rennes1.fr](mailto:Jean-Francois.Halet@univ-rennes1.fr); [sghosh@iitm.ac.in](mailto:sghosh@iitm.ac.in); Tel.: +91 44-22574230.

## Table of contents

### I. Spectroscopic details

|                   |                                                                                                    | Page No. |
|-------------------|----------------------------------------------------------------------------------------------------|----------|
| <b>Figure S1</b>  | $^1\text{H}$ NMR spectrum of <b>1</b> in $\text{CDCl}_3$ .                                         | S3       |
| <b>Figure S2</b>  | $^1\text{H}\{^{11}\text{B}\}$ NMR spectrum of <b>1</b> in $\text{CDCl}_3$ .                        | S3       |
| <b>Figure S3</b>  | $^1\text{H}\text{-}^{11}\text{B}\{^1\text{H}\}$ HSQC NMR spectrum of <b>1</b> in $\text{CDCl}_3$ . | S4       |
| <b>Figure S4</b>  | $^{11}\text{B}\{^1\text{H}\}$ NMR spectrum of <b>1</b> in $\text{CDCl}_3$                          | S4       |
| <b>Figure S5</b>  | $^{13}\text{C}\{^1\text{H}\}$ NMR spectrum of <b>1</b> in $\text{CDCl}_3$ .                        | S5       |
| <b>Figure S6</b>  | ESI-MS spectrum of <b>1</b> in $\text{CH}_2\text{Cl}_2$ and MeOH mixture.                          | S5       |
| <b>Figure S7</b>  | IR spectrum of <b>1</b> in $\text{CH}_2\text{Cl}_2$ .                                              | S6       |
| <b>Figure S8</b>  | $^1\text{H}$ NMR spectrum of <b>4</b> in $\text{CDCl}_3$ .                                         | S6       |
| <b>Figure S9</b>  | $^{11}\text{B}\{^1\text{H}\}$ NMR spectrum of <b>4</b> in $\text{CDCl}_3$ .                        | S7       |
| <b>Figure S10</b> | $^{13}\text{C}\{^1\text{H}\}$ NMR spectrum of <b>4</b> in $\text{CDCl}_3$ .                        | S7       |
| <b>Figure S11</b> | ESI-MS spectrum of <b>4</b> in $\text{CH}_2\text{Cl}_2$ and MeOH mixture.                          | S8       |
| <b>Figure S12</b> | IR spectrum of <b>4</b> in $\text{CH}_2\text{Cl}_2$ .                                              | S8       |

### II. Computational Data

|                   |                                                                                                                                               |     |
|-------------------|-----------------------------------------------------------------------------------------------------------------------------------------------|-----|
| <b>Table S1</b>   | Selected geometrical parameters and Wiberg bond indices (WBI) of <b>1'</b> - <b>4'</b> .                                                      | S9  |
| <b>Table S2</b>   | Experimentally observed and calculated $^{11}\text{B}$ chemical shifts of <b>1'</b> - <b>4'</b> .                                             | S9  |
| <b>Table S3</b>   | Calculated natural charges ( $q$ ), natural valence population (Pop) and HOMO–LUMO gaps of <b>1'</b> - <b>4'</b> .                            | S10 |
| <b>Figure S13</b> | Selected natural bonding orbitals of <b>1'</b> . Isosurfaces are plotted at an isovalue of $\pm 0.04$ ( $\text{e}/\text{bohr}^3$ ) $^{1/2}$ . | S10 |
| <b>Figure S14</b> | Selected molecular orbitals of <b>4'</b> . Isosurfaces are plotted at an isovalue of $\pm 0.04$ ( $\text{e}/\text{bohr}^3$ ) $^{1/2}$ .       | S11 |
| <b>Figure S15</b> | Optimized geometry of <b>1'</b> .                                                                                                             | S11 |
| <b>Figure S16</b> | Optimized geometry of <b>2'</b> .                                                                                                             | S12 |
| <b>Figure S17</b> | Optimized geometry of <b>3'</b> .                                                                                                             | S13 |
| <b>Figure S18</b> | Optimized geometry of <b>4'</b> .                                                                                                             | S14 |

## I. Spectroscopic Details

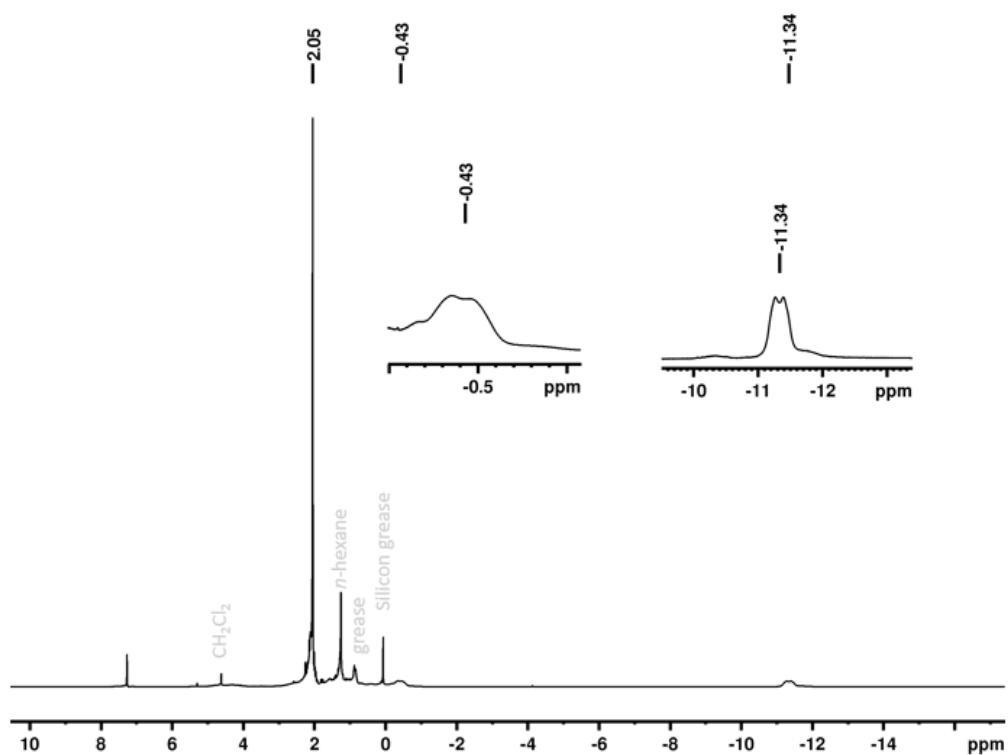

**Figure S1.**  $^1\text{H}$  NMR spectrum of **1** in  $\text{CDCl}_3$ .

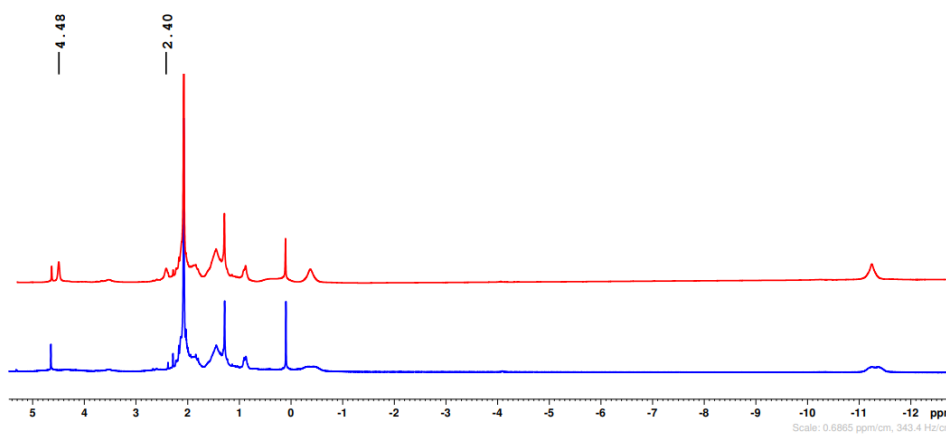

**Figure S2.** Stacked  $^1\text{H}$  (bottom; blue) and  $^1\text{H}\{^{11}\text{B}\}$  NMR (top; red) spectrum of **1** in  $\text{CDCl}_3$ .

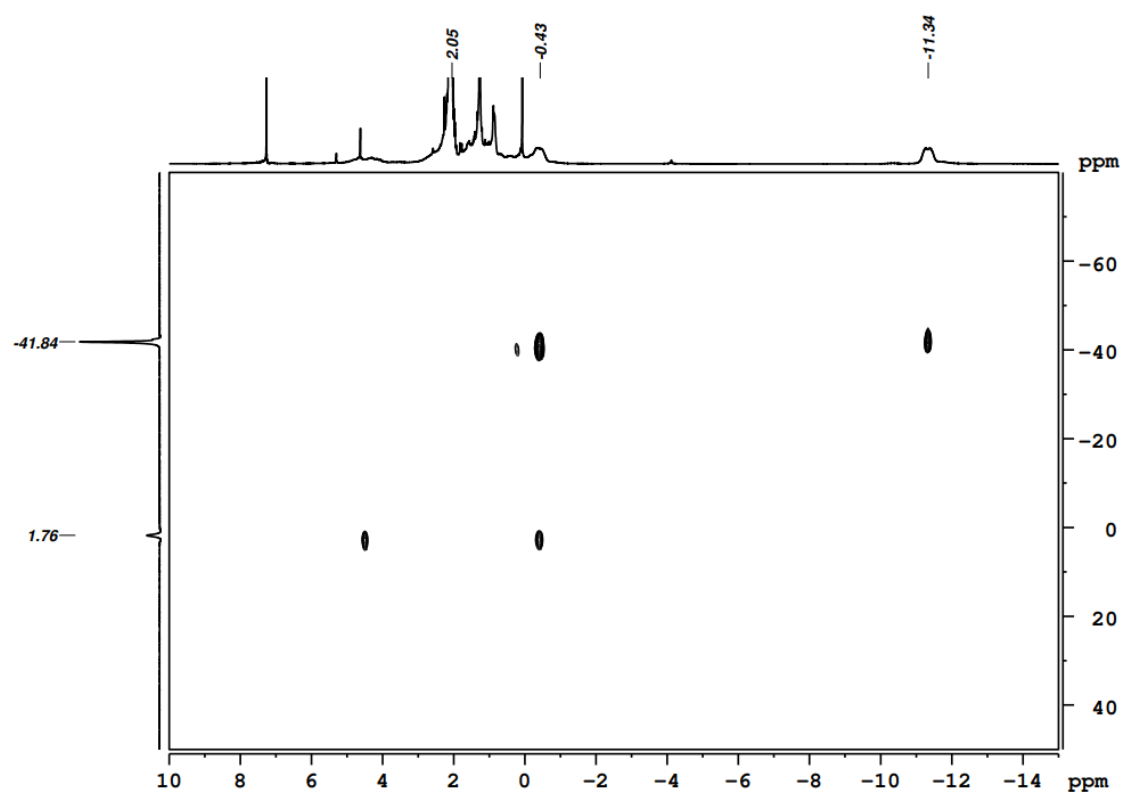

**Figure S3.**  $^1\text{H}$ - $^{11}\text{B}\{^1\text{H}\}$  HSQC NMR spectrum of **1** in  $\text{CDCl}_3$ .

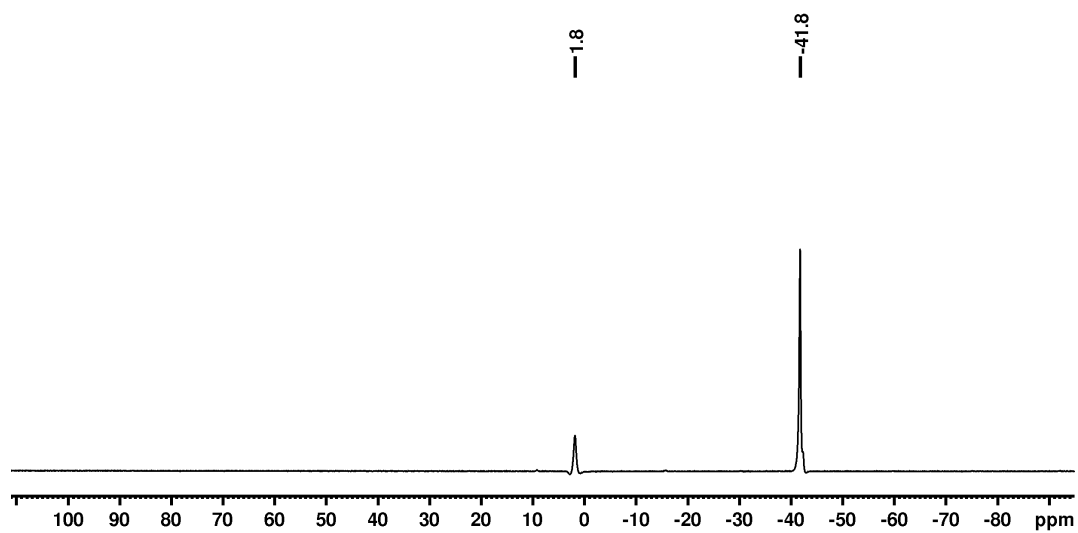

**Figure S4.**  $^{11}\text{B}\{^1\text{H}\}$  NMR spectrum of **1** in  $\text{C}_6\text{D}_6$ .

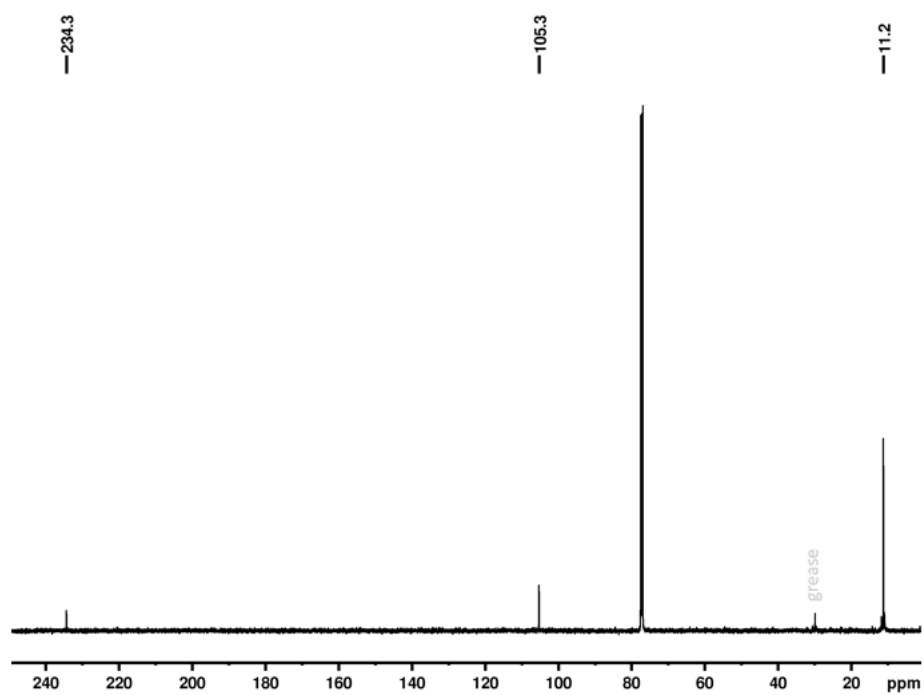

**Figure S5.**  $^{13}\text{C}\{^1\text{H}\}$  NMR spectrum of **1** in  $\text{CDCl}_3$ .

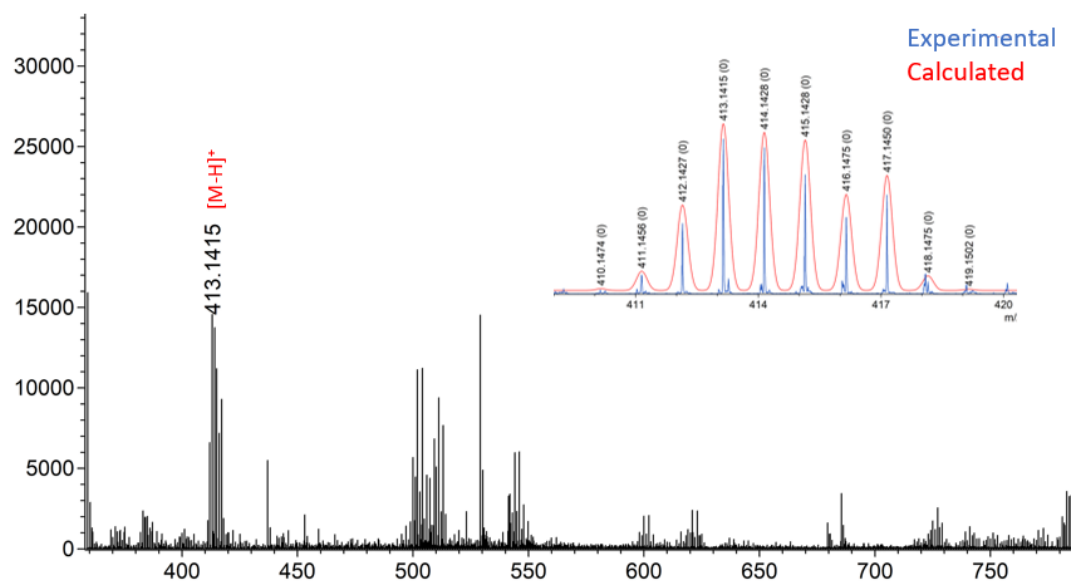

**Figure S6.** ESI-MS spectrum of **1** in  $\text{CH}_2\text{Cl}_2$  and MeOH mixture.

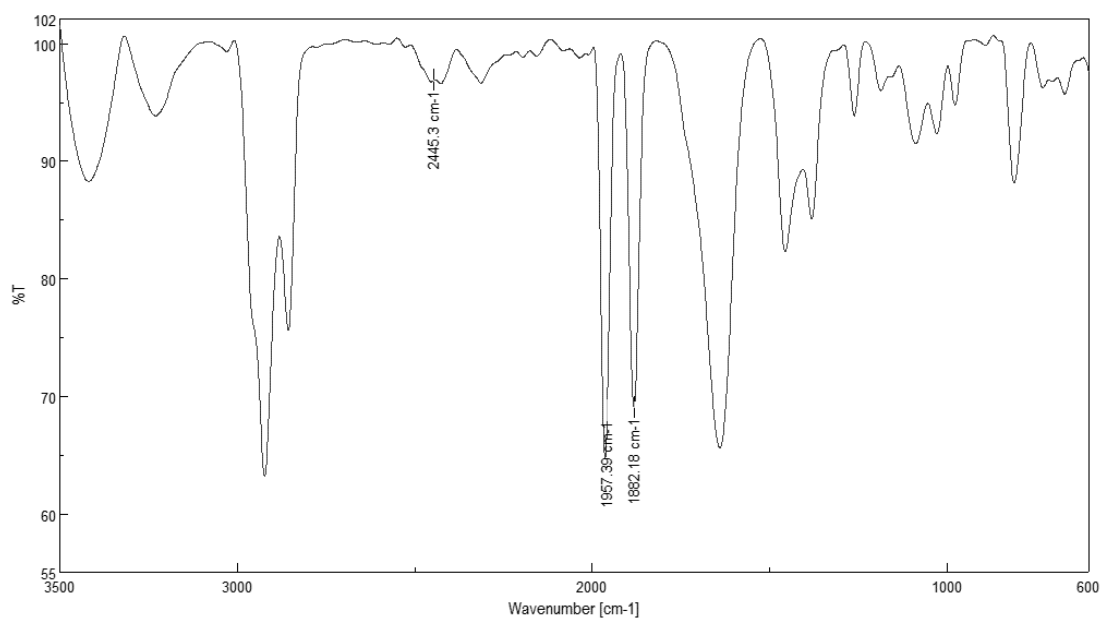

**Figure S7.** IR spectrum of **1** in  $\text{CH}_2\text{Cl}_2$ .

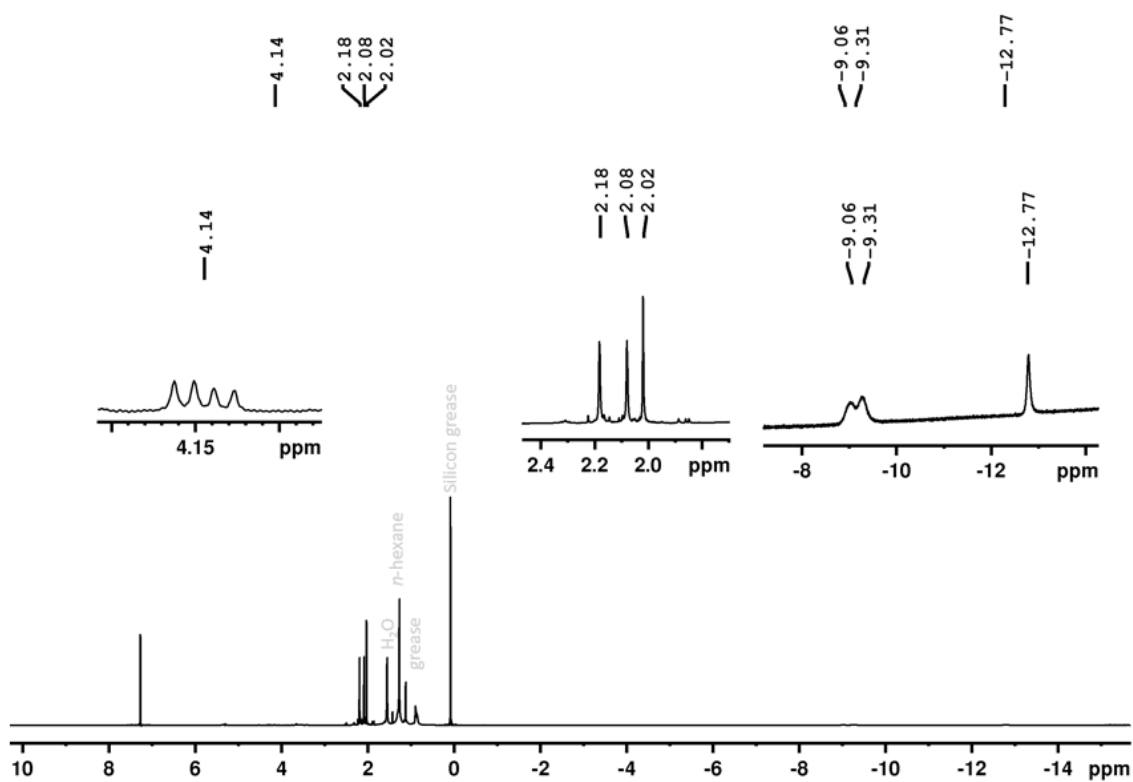

**Figure S8.**  $^1\text{H}$  NMR spectrum of **4** in  $\text{CDCl}_3$ .

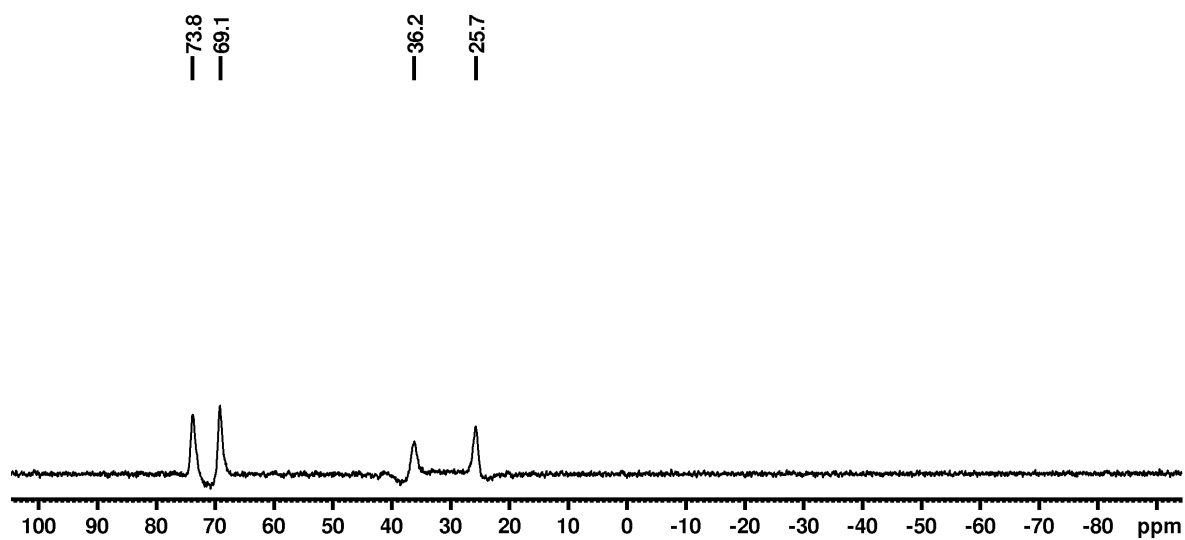

Figure S9.  $^{11}\text{B}\{^1\text{H}\}$  NMR spectrum of **4** in CDCl<sub>3</sub>.

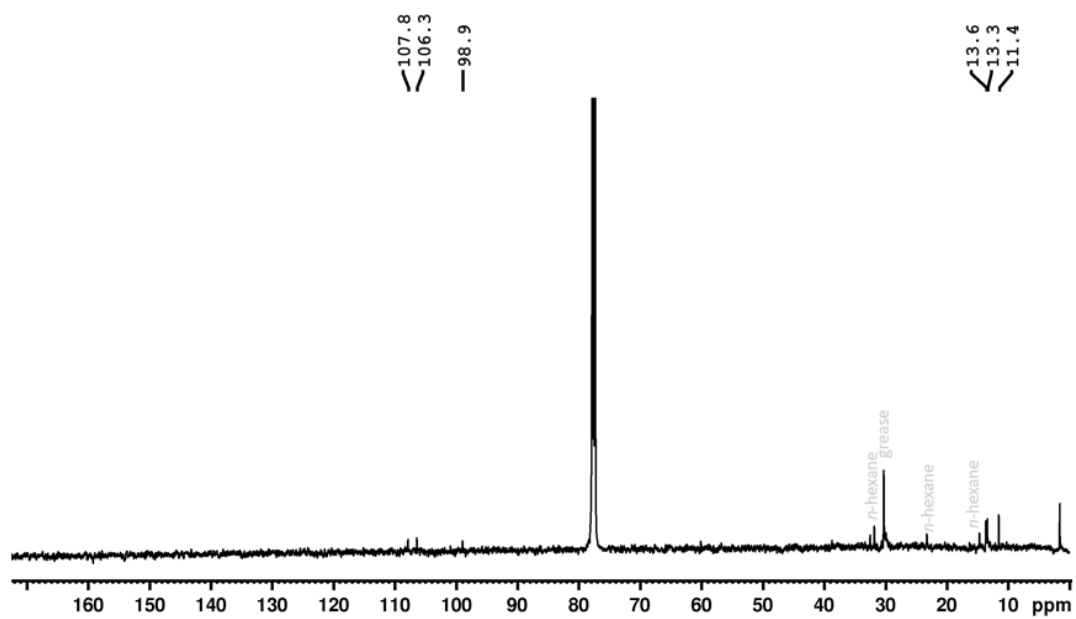

Figure S10.  $^{13}\text{C}\{^1\text{H}\}$  NMR spectrum of **4** in CDCl<sub>3</sub>.

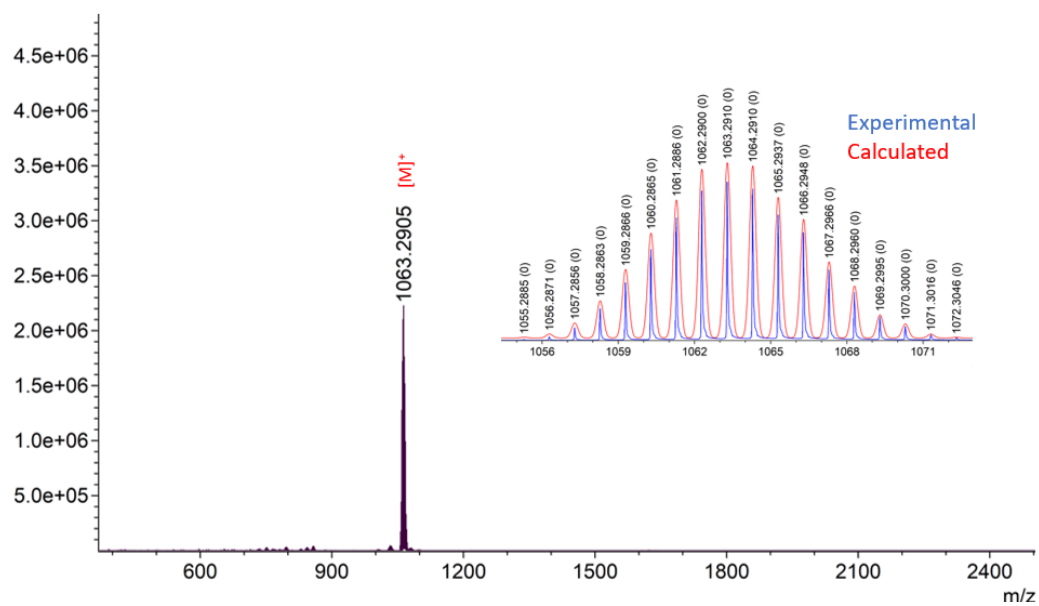

**Figure S11.** ESI-MS spectrum of **4** in CH<sub>2</sub>Cl<sub>2</sub> and MeOH mixture.

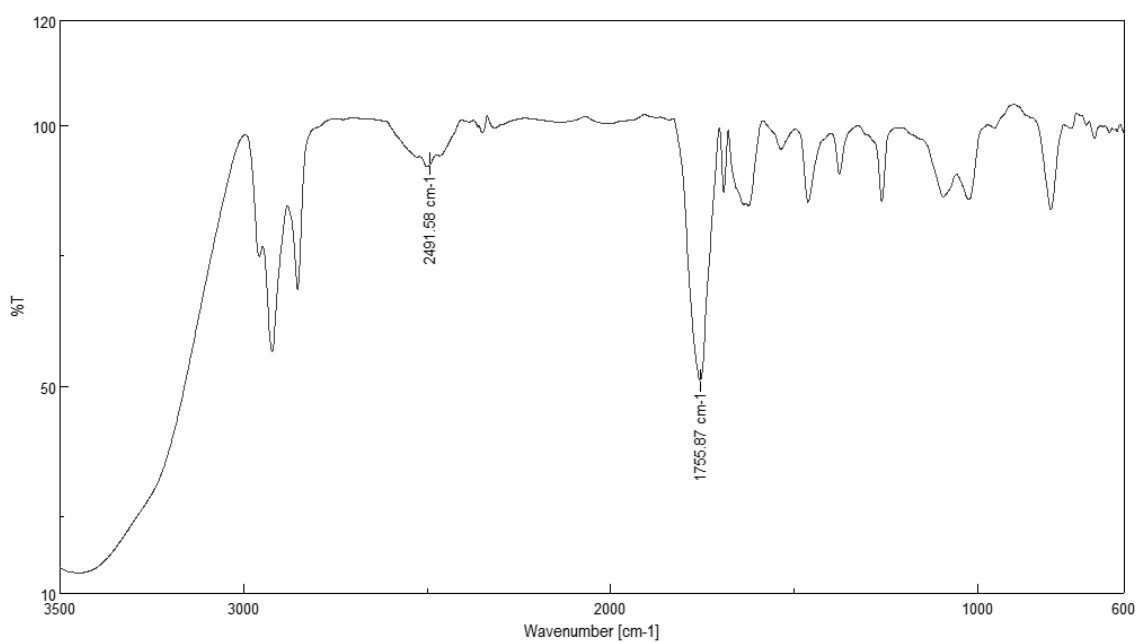

**Figure S12.** IR spectrum of **4** in CH<sub>2</sub>Cl<sub>2</sub>.



## II. Computational Data

**Table S1.** Selected geometrical parameters and Wiberg bond indices (WBI) of **1'-4'**.

| <b>1'</b> |       |       |       | <b>2'</b> |       |       |       |
|-----------|-------|-------|-------|-----------|-------|-------|-------|
|           | Expt. | Cal.  | WBI   |           | Expt. | Cal.  | WBI   |
| W1-B1     | 2.511 | 2.568 | 0.313 | Mo1-B1    | 2.548 | 2.575 | 0.324 |
| W1-B2     | 2.511 | 2.568 | 0.313 | Mo1-B2    | 2.544 | 2.575 | 0.323 |
| B1-B2     | 1.705 | 1.799 | 0.536 | B1-B2     | 1.732 | 1.797 | 0.538 |
| B2-B3     | 1.794 | 1.799 | 0.536 | B2-B3     | 1.777 | 1.797 | 0.538 |
| B1-B3     | 1.802 | 1.723 | 0.739 | B1-B3     | 1.797 | 1.725 | 0.728 |
| <b>3'</b> |       |       |       | <b>4'</b> |       |       |       |
|           | Expt. | Cal.  | WBI   |           | Expt. | Cal.  | WBI   |
| Cr1-B1    | —     | 2.507 | 0.323 | W1-W2     | 2.961 | 3.048 | 0.391 |
| Cr1-B2    | —     | 2.507 | 0.323 | W1-W3     | 2.948 | 2.938 | 0.545 |
| B1-B2     | —     | 1.792 | 0.542 | W2-W3     | 2.845 | 2.850 | 0.738 |
| B2-B3     | —     | 1.792 | 0.542 | W1-B1     | 2.336 | 2.395 | 0.408 |
| B1-B3     | —     | 1.723 | 0.724 | B1-B2     | 1.714 | 1.743 | 0.442 |

**Table S2.** Experimentally observed and calculated  $^{11}\text{B}$  chemical shifts of **1'-4'**.

| $^{11}\text{B}$ - NMR value<br>(ppm) | <b>1'</b>       | <b>2'</b>      | <b>3'</b>      | <b>4'</b>                       |
|--------------------------------------|-----------------|----------------|----------------|---------------------------------|
| Experimental                         | 1.8,<br>-41.8   | 1.0,<br>-39.1  | —              | 25.7,<br>36.2,<br>69.1,<br>73.8 |
| Theoretical                          | -0.8,<br>-47.2, | -0.1,<br>-45.0 | -1.7,<br>-45.6 | 11.4,<br>19.1<br>61.7<br>73.1   |

**Table S3.** Calculated natural charges ( $q$ ), natural valence population (Pop) and HOMO–LUMO gaps of **1'**–**3'**.

| Cluster   | $Q$          | Pop         | HOMO<br>(eV) | LUMO<br>(eV) | $\Delta E_{\text{H-L}}$<br>(eV) |
|-----------|--------------|-------------|--------------|--------------|---------------------------------|
| <b>1'</b> | -0.466 (W1)  | 6.459 (W1)  | -6.046       | -2.278       | 3.768                           |
|           | -0.379 (B1)  | 3.354 (B1)  |              |              |                                 |
|           | -0.379 (B2)  | 3.354 (B2)  |              |              |                                 |
|           | -0.188 (B3)  | 3.177 (B3)  |              |              |                                 |
| <b>2'</b> | -0.953 (Mo1) | 6.946 (Mo1) | -6.241       | -2.419       | 3.822                           |
|           | -0.347 (B1)  | 3.220 (B1)  |              |              |                                 |
|           | -0.347 (B2)  | 3.220 (B2)  |              |              |                                 |
|           | -0.190 (B3)  | 3.179 (B3)  |              |              |                                 |
| <b>3'</b> | -1.571 (Cr1) | 7.552 (Cr1) | -6.538       | -2.376       | 4.161                           |
|           | -0.322 (B1)  | 3.296 (B1)  |              |              |                                 |
|           | -0.322 (B2)  | 3.296 (B2)  |              |              |                                 |
|           | -0.195 (B3)  | 3.183 (B3)  |              |              |                                 |
| <b>4'</b> | -0.349 (W1)  | 6.401 (W1)  | -4.991       | -2.278       | 2.713                           |
|           | -0.234 (W2)  | 6.202 (W2)  |              |              |                                 |
|           | -0.177 (W3)  | 6.152 (W3)  |              |              |                                 |
|           | -0.213 (B1)  | 3.166 (B1)  |              |              |                                 |

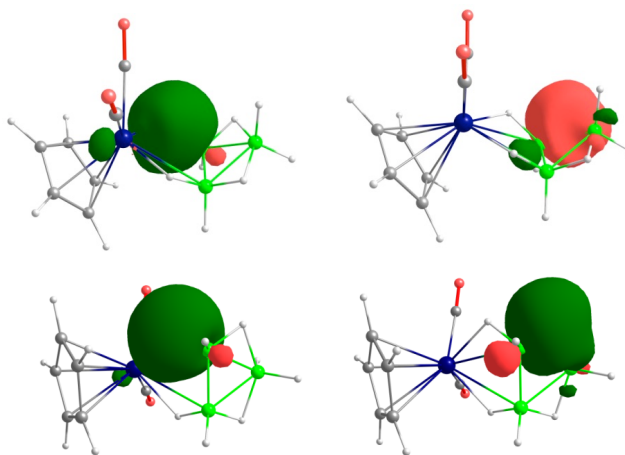

**Figure S13.** Selected natural bonding orbitals of **1'**. Isosurfaces are plotted at an isovalue of  $\pm 0.04 \text{ (e/bohr}^3)^{1/2}$ .

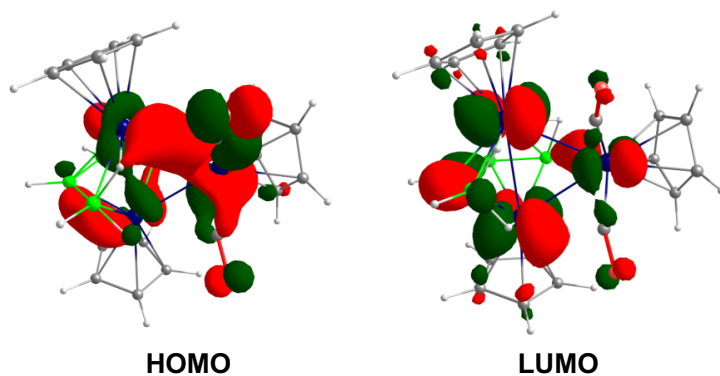

**Figure S14.** Selected molecular orbitals of **4'**. Isosurfaces are plotted at an isovalue of  $\pm 0.04$  ( $e/\text{bohr}^3$ )<sup>1/2</sup>.

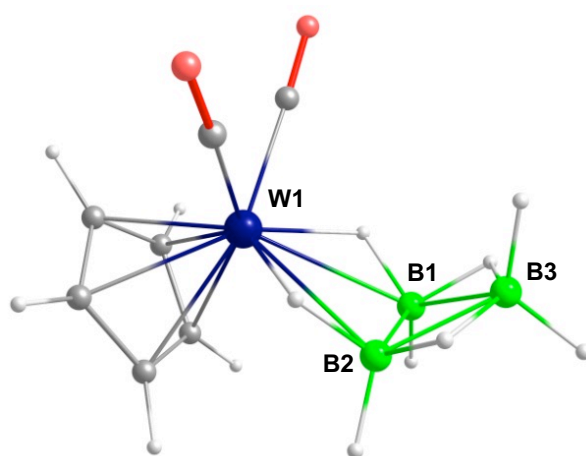

**Figure S15.** Optimized geometry of **1'**.  
Total Energy = -566.9331 a.u.

|   |              |              |              |   |              |              |              |
|---|--------------|--------------|--------------|---|--------------|--------------|--------------|
| C | -0.537367000 | 1.485084000  | -1.215974000 | H | -2.807120000 | -1.329289000 | 1.401082000  |
| C | 1.727507000  | -1.584171000 | 0.703579000  | H | -3.684125000 | -0.195172000 | 0.000036000  |
| C | 2.285689000  | 0.539209000  | 0.002952000  | H | -4.063096000 | -2.206852000 | -0.001576000 |
| C | -0.539732000 | 1.483586000  | 1.216365000  | B | -1.728650000 | -1.638429000 | -0.863201000 |
| C | 1.729107000  | -1.581741000 | -0.706303000 | H | -2.807383000 | -1.326635000 | -1.403130000 |
| C | 2.060434000  | -0.275934000 | 1.153267000  | H | -1.101229000 | -0.626680000 | -1.361978000 |
| C | 2.062944000  | -0.272006000 | -1.150633000 | H | -1.355819000 | -2.655613000 | -1.354181000 |
| B | -1.728499000 | -1.640048000 | 0.860338000  | W | 0.032369000  | 0.020101000  | -0.000043000 |
| B | -3.274371000 | -1.314484000 | -0.000784000 | H | 1.481534000  | -2.425457000 | 1.331512000  |
| O | -0.823558000 | 2.346590000  | 1.923695000  | H | 2.180319000  | 0.026883000  | 2.180582000  |
| O | -0.820125000 | 2.348913000  | -1.922677000 | H | 2.624237000  | 1.561882000  | 0.005033000  |
| H | -1.100919000 | -0.629421000 | 1.361143000  | H | 2.184840000  | 0.034439000  | -2.176611000 |
| H | -1.355510000 | -2.658026000 | 1.349561000  | H | 1.484533000  | -2.420904000 | -1.337747000 |

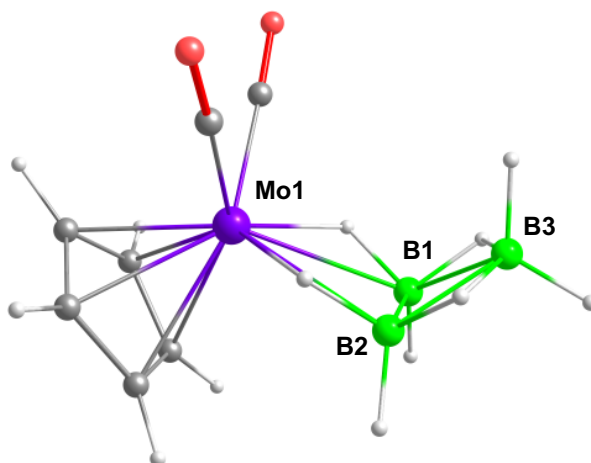

**Figure S16.** Optimized geometry of **2'**.  
Total Energy = -568.0540 a.u.

|   |              |              |              |    |              |              |              |
|---|--------------|--------------|--------------|----|--------------|--------------|--------------|
| C | 0.502748000  | 1.474496000  | 1.221332000  | H  | 3.653868000  | -0.085131000 | 0.000317000  |
| C | -1.720322000 | -1.587019000 | -0.703322000 | H  | 4.117230000  | -2.077677000 | 0.000167000  |
| C | -2.289754000 | 0.530678000  | -0.001466000 | B  | 1.760499000  | -1.605044000 | 0.862088000  |
| C | 0.502564000  | 1.475759000  | -1.220615000 | H  | 2.827672000  | -1.262199000 | 1.405278000  |
| C | -1.720928000 | -1.585330000 | 0.705744000  | H  | 1.085636000  | -0.624689000 | 1.351620000  |
| C | -2.061078000 | -0.280843000 | -1.150962000 | H  | 1.418655000  | -2.634505000 | 1.350884000  |
| C | -2.061979000 | -0.278145000 | 1.150027000  | Mo | -0.044616000 | 0.017195000  | -0.000269000 |
| B | 1.760827000  | -1.603890000 | -0.863191000 | H  | -1.470354000 | -2.426293000 | -1.332411000 |
| B | 3.290011000  | -1.220482000 | 0.000241000  | H  | -2.181299000 | 0.023278000  | -2.177936000 |
| O | 0.775439000  | 2.336812000  | -1.929016000 | H  | -2.628979000 | 1.553309000  | -0.002763000 |
| O | 0.775471000  | 2.334814000  | 1.930718000  | H  | -2.182809000 | 0.028417000  | 2.176205000  |
| H | 1.086943000  | -0.622519000 | -1.352368000 | H  | -1.471370000 | -2.423084000 | 1.337030000  |
| H | 1.418515000  | -2.632700000 | -1.353075000 |    |              |              |              |
| H | 2.828703000  | -1.261890000 | -1.405394000 |    |              |              |              |

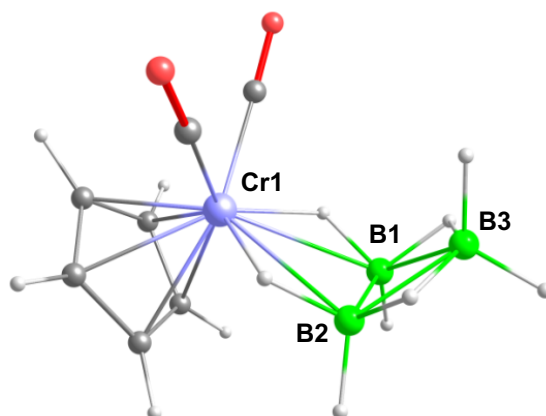

**Figure S17.** Optimized geometry of **3'**.  
Total Energy = -1544.2724 a.u.

|   |              |              |              |    |              |              |              |
|---|--------------|--------------|--------------|----|--------------|--------------|--------------|
| C | 0.344048000  | 1.386210000  | 1.193258000  | H  | 2.785397000  | -0.961493000 | -1.410427000 |
| C | -1.494942000 | -1.624363000 | -0.702129000 | H  | 3.443479000  | 0.318785000  | 0.000440000  |
| C | -2.211973000 | 0.441923000  | -0.001081000 | H  | 4.172067000  | -1.590066000 | -0.001017000 |
| C | 0.342685000  | 1.386749000  | -1.192817000 | B  | 1.776046000  | -1.442971000 | 0.860856000  |
| C | -1.495761000 | -1.623069000 | 0.704451000  | H  | 2.785427000  | -0.963349000 | 1.409611000  |
| C | -1.928398000 | -0.348791000 | -1.148060000 | H  | 0.942205000  | -0.593641000 | 1.307813000  |
| C | -1.929752000 | -0.346746000 | 1.147584000  | H  | 1.567044000  | -2.507986000 | 1.349911000  |
| B | 1.776083000  | -1.442035000 | -0.862262000 | Cr | -0.077759000 | 0.010085000  | 0.000149000  |
| B | 3.233842000  | -0.855788000 | -0.000488000 | H  | -1.172052000 | -2.438003000 | -1.330604000 |
| O | 0.563225000  | 2.234311000  | -1.927883000 | H  | -2.054154000 | -0.047609000 | -2.175294000 |
| O | 0.565550000  | 2.233672000  | 1.928147000  | H  | -2.597479000 | 1.448343000  | -0.002169000 |
| H | 0.941768000  | -0.592657000 | -1.307992000 | H  | -2.056575000 | -0.043710000 | 2.174143000  |
| H | 1.567139000  | -2.506473000 | -1.352648000 | H  | -1.173548000 | -2.435550000 | 1.334780000  |

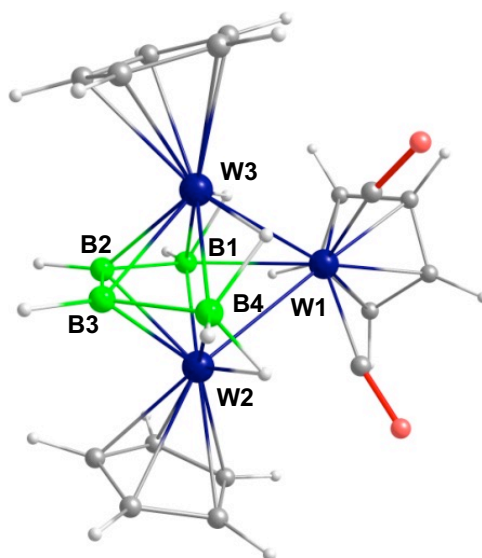

**Figure S18.** Optimized geometry of **4'**.  
Total Energy = -1112.7886 a.u.

|   |              |              |              |   |              |              |              |
|---|--------------|--------------|--------------|---|--------------|--------------|--------------|
| B | -0.679232000 | -1.700634000 | 1.628606000  | O | -1.572590000 | 2.306837000  | 2.083058000  |
| B | -0.931405000 | -2.516485000 | 0.109085000  | O | 2.640136000  | 0.626698000  | 2.166879000  |
| H | -1.360634000 | -3.627656000 | 0.080498000  | H | -0.964690000 | -2.324339000 | 2.604040000  |
| B | -0.670655000 | -1.757054000 | -1.408154000 | H | -0.866599000 | 0.759459000  | -1.190346000 |
| H | -0.873830000 | -2.385440000 | -2.397037000 | H | 0.533967000  | -1.272688000 | 1.849794000  |
| B | 0.050933000  | -0.188642000 | -1.576134000 | H | -1.354960000 | -0.565079000 | 1.778066000  |
| H | 0.228353000  | 0.081638000  | -2.724658000 | H | -4.056480000 | -2.142961000 | 0.948966000  |
| C | 2.271139000  | -3.369593000 | 0.351380000  | H | -3.738915000 | -1.967301000 | -1.711785000 |
| C | 2.098636000  | -3.174361000 | -1.043443000 | H | -3.923921000 | 0.354373000  | 1.963383000  |
| C | 2.775453000  | -1.980197000 | -1.411207000 | H | -3.553581000 | 2.054406000  | -0.063493000 |
| C | 3.358610000  | -1.434462000 | -0.240406000 | H | -3.442102000 | 0.620804000  | -2.345967000 |
| C | 3.043138000  | -2.287667000 | 0.849523000  | H | -0.442740000 | 3.504966000  | -2.185741000 |
| C | -3.905730000 | -1.235510000 | 0.389212000  | H | -0.219084000 | 4.495392000  | 0.301381000  |
| C | -3.845329000 | 0.082513000  | 0.923452000  | H | 2.198144000  | 3.826987000  | 1.252191000  |
| C | -3.646711000 | 0.984800000  | -0.151174000 | H | 3.489977000  | 2.435698000  | -0.659182000 |
| C | -3.586679000 | 0.226611000  | -1.353180000 | H | 1.836258000  | 2.198965000  | -2.762922000 |
| C | -3.743647000 | -1.142179000 | -1.020622000 | H | 3.936798000  | -0.528406000 | -0.178732000 |
| C | 0.404982000  | 3.390541000  | -1.529958000 | H | 2.835119000  | -1.568494000 | -2.404613000 |
| C | 0.528677000  | 3.922515000  | -0.222620000 | H | 3.334939000  | -2.127965000 | 1.874603000  |
| C | 1.801515000  | 3.562068000  | 0.286178000  | H | 1.873569000  | -4.187412000 | 0.928902000  |
| C | 2.484470000  | 2.816461000  | -0.726858000 | H | 1.550005000  | -3.819573000 | -1.707758000 |
| C | 1.619848000  | 2.708423000  | -1.838827000 | W | -1.715861000 | -0.424735000 | -0.005505000 |
| C | -0.836041000 | 1.834866000  | 1.301309000  | W | 0.967128000  | -1.384457000 | 0.058688000  |
| C | 1.805421000  | 0.767789000  | 1.350982000  | W | 0.611237000  | 1.532093000  | -0.005865000 |
